# Supplementary material for: Facile preparation of carbon-supported PtNi hollow nanoparticles with high electrochemical performance
Source: Royal Society of Chemistry journal article supplement (doi:10.1039/c2jm16827h), 2012-01-01
Supplement: c2jm16827h.pdf [file c2jm16827h.pdf]

# Facile Preparation of Carbon-Supported PtNi Hollow Nanoparticles with High Electrochemical Performance

Sung Jong Bae,<sup>a,⊥</sup> Sung Jong Yoo,<sup>b,⊥</sup> Yuntaek Lim,<sup>c</sup> Sojeong Kim,<sup>a</sup> Yirang Lim,<sup>a</sup> Junghun Choi,<sup>c</sup> Kee Suk Nahm,<sup>a,c</sup> Seung Jun Hwang,<sup>b</sup> Tae-Hoon Lim,<sup>b</sup> Soo-Kil Kim,<sup>\*d</sup> and Pil Kim<sup>\*a,c</sup>

\*Corresponding authors.

<sup>a</sup>Department of Hydrogen and Fuel Cell Engineering, Chonbuk National University, JeonJu, Jeonbuk, 561-756, Republic of Korea.

<sup>b</sup>Fuel Cell Center, Korea Institute of Science and Technology, 39-1 Hawolgok-dong, Seoul 136-791, Republic of Korea.

<sup>c</sup>School of Semiconductor and Chemical Engineering, Chonbuk National University, JeonJu, Jeonbuk, 561-756, Republic of Korea.

<sup>d</sup>Department of Integrative Engineering, Chung-Ang University, Seoul, 156-756, Republic of Korea.

<sup>⊥</sup>These authors contributed equally to this work

E-mail: [kimpil1@chonbuk.ac.kr](mailto:kimpil1@chonbuk.ac.kr); [sookilkim@cau.ac.kr](mailto:sookilkim@cau.ac.kr)

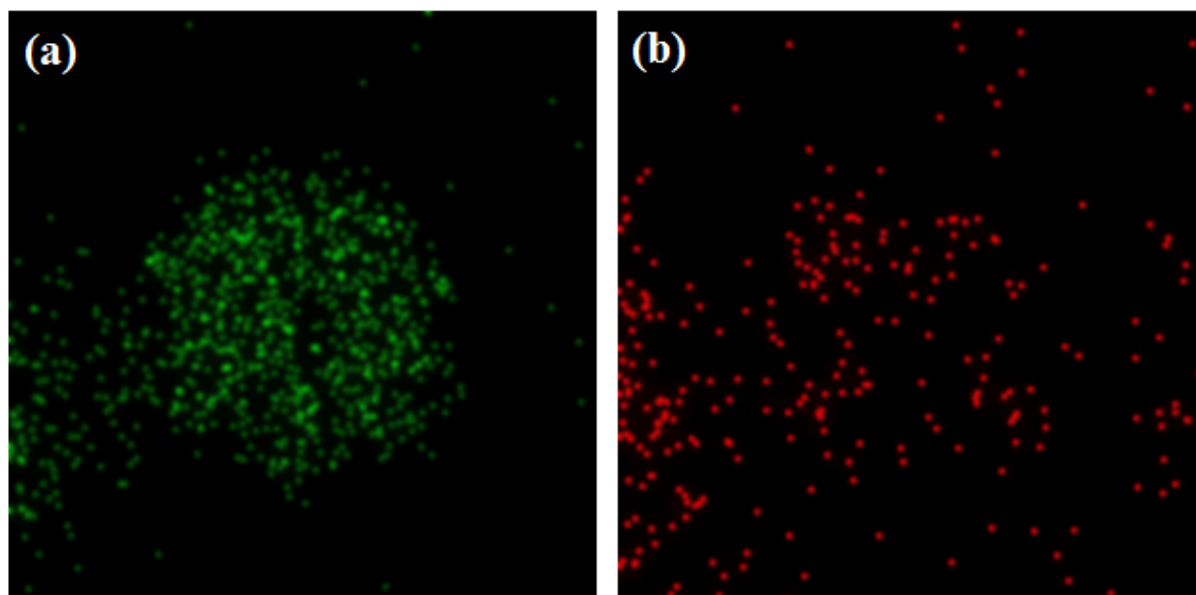

**Fig. S1** Elemental mapping of (a) Pt and (b) Ni for PtNi-H/C.

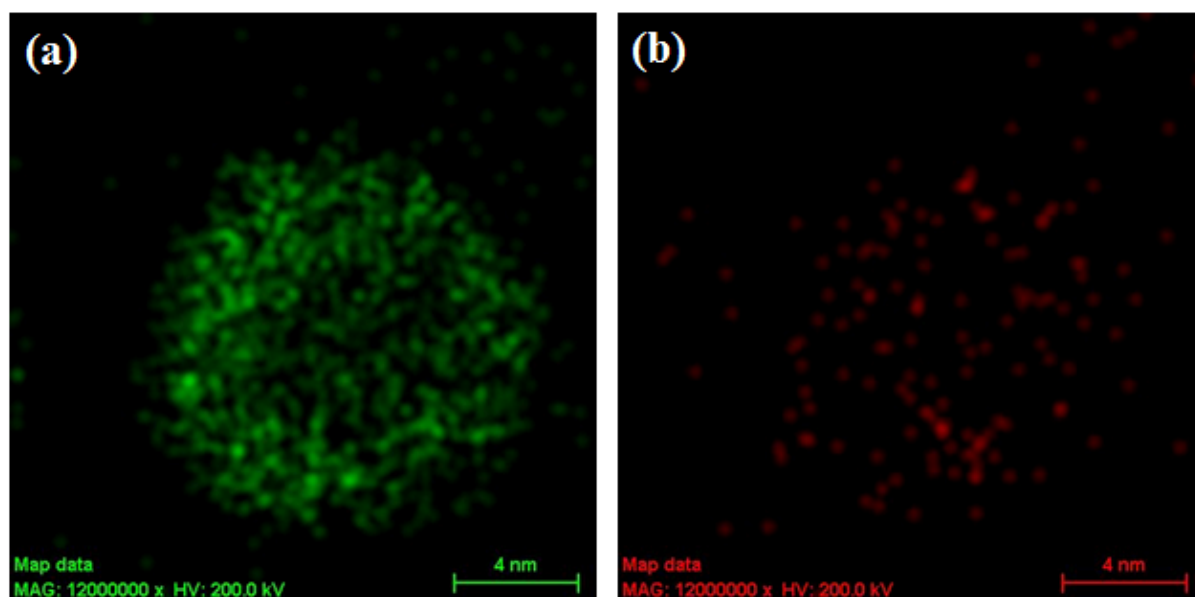

**Fig. S2** Elemental mapping of (a) Pt and (b) Ni for PtNi-H-A/C.

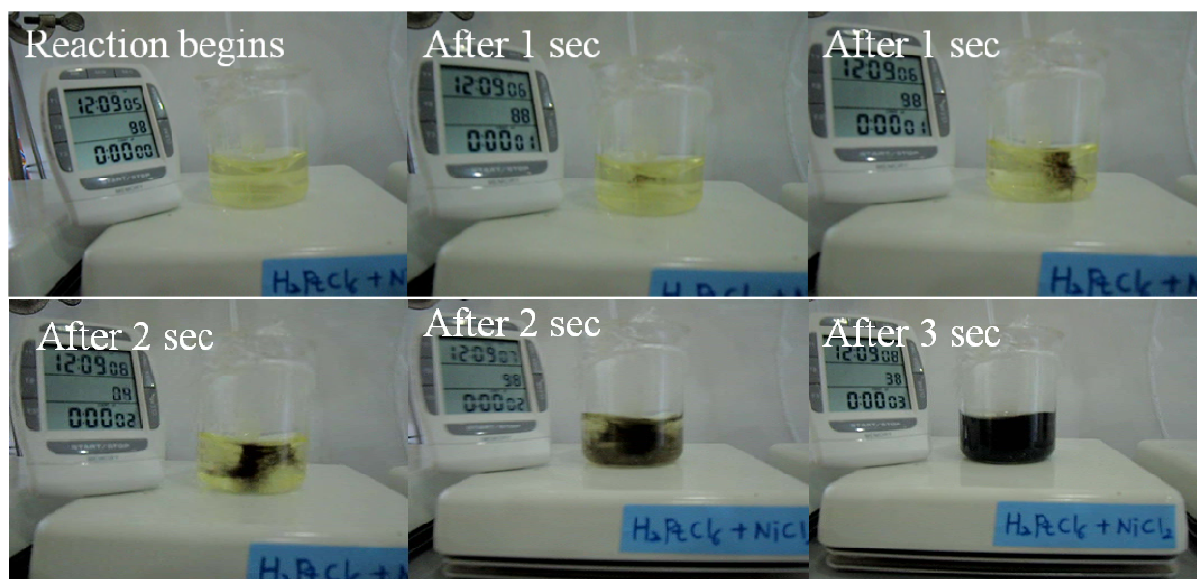

**Fig. S3** Photographs of precursor solution containing  $\text{H}_2\text{PtCl}_6$  and  $\text{NiCl}_2$  during the reduction using  $\text{NaBH}_4$  solution (320 mM). Each precursor (1.6 mmol) was dissolved in triply distilled water.

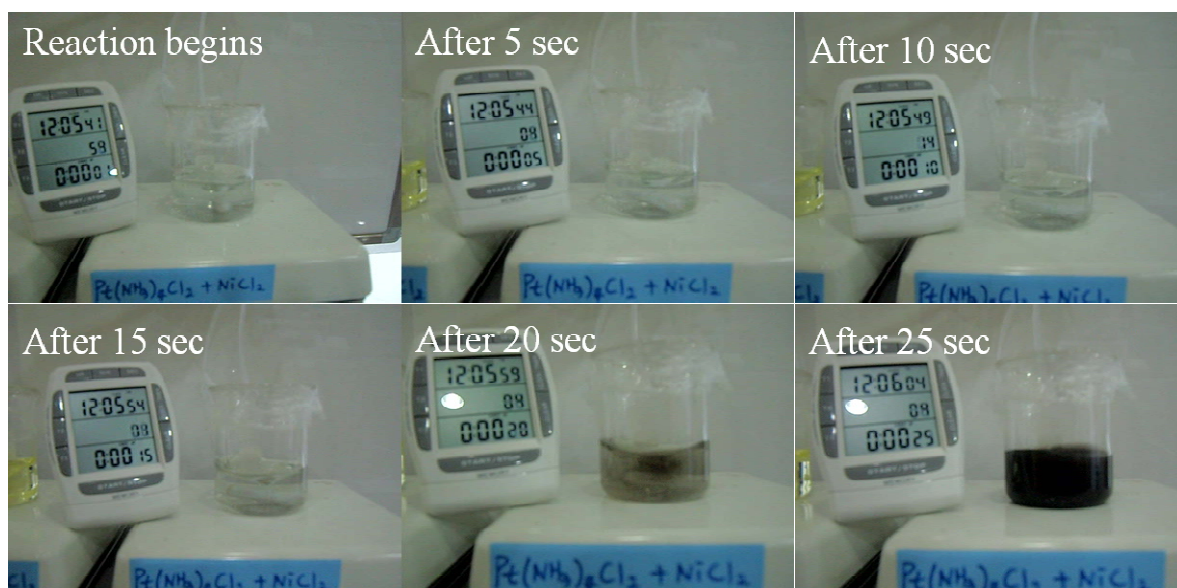

**Fig. S4** Photographs of precursor solution containing  $\text{Pt}(\text{NH}_3)_4\text{Cl}_2$  and  $\text{NiCl}_2$  during the reduction using  $\text{NaBH}_4$  solution (320 mM). Each precursor (1.6 mmol) was dissolved in triply distilled water.

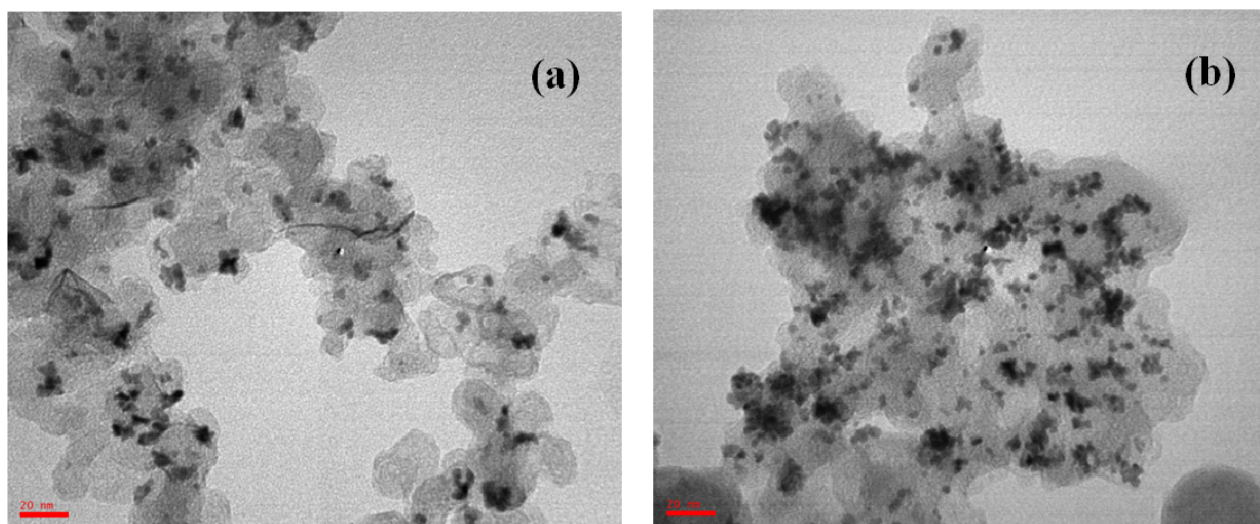

**Fig. S5** TEM images of PtNi-S/C and PtNi-S-A/C. The PtNi-S/C and PtNi-S-A/C were prepared using  $\text{H}_2\text{PtCl}_6$  and  $\text{NiCl}_2$  precursors through the same procedure as that used for PtNi-H/C and PtNi-H-A/C, respectively. In contrast to PtNi-H/C and PtNi-H-A/C, these catalysts show only solid nanoparticles supported on the carbon support.

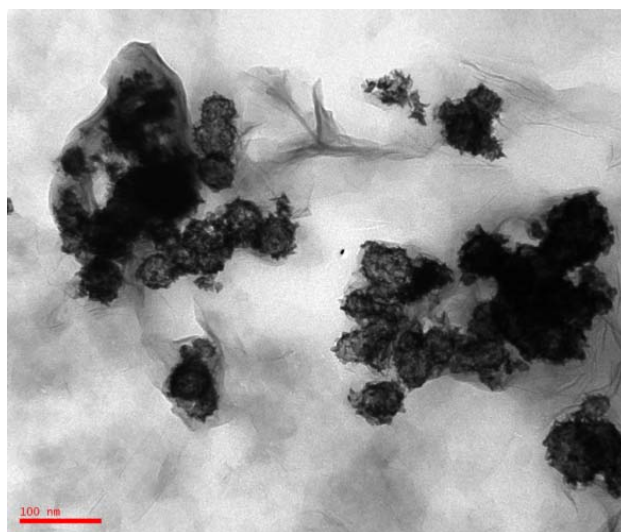

**Fig. S6** TEM image of PtNi samples prepared using  $\text{Pt}(\text{NH}_3)_4\text{Cl}_2$  and  $\text{NiCl}_2$  precursor without carbon support.



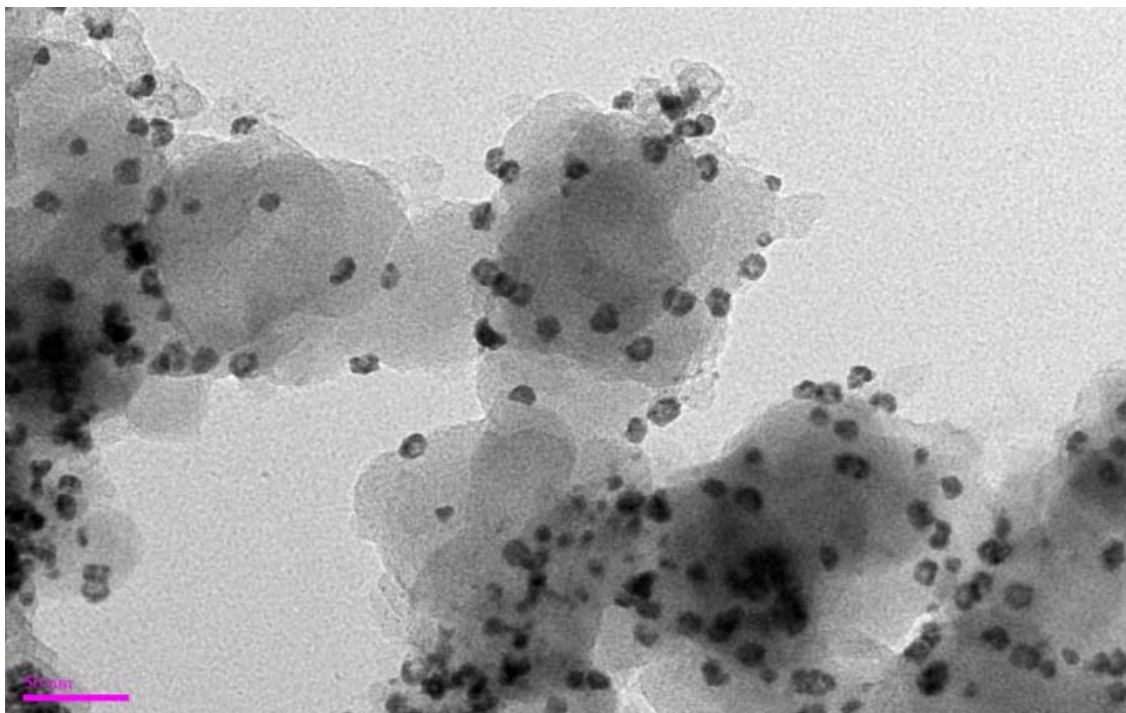

**Fig. S7** TEM image of carbon-supported PtNi hollow nanoparticles prepared using Bis(ethylenediammine)platinum (II) chloride and  $\text{NiCl}_2$  precursors. The atomic ratio of Pt to Ni in the precursor solution was 1.0. The preparation procedure was the same as that in the case of PtNi-H/C.



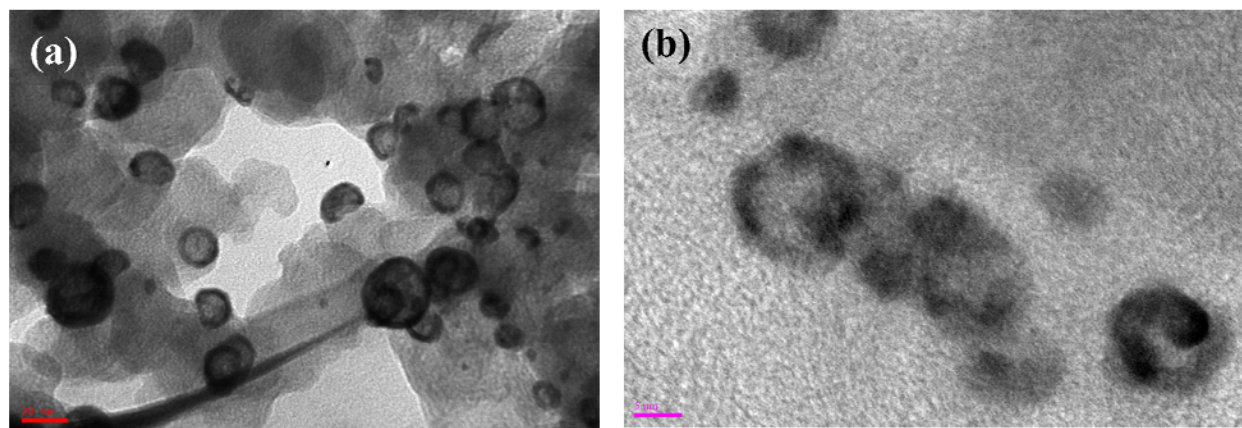

**Fig. S8** TEM image of carbon-supported PtM (M=Co or Cu) hollow nanoparticles prepared using (a)  $\text{Pt}(\text{NH}_3)_4\text{Cl}_2$  and  $\text{CoCl}_2$  and (b)  $\text{Pt}(\text{NH}_3)_4\text{Cl}_2$  and  $\text{CuCl}_2$  precursors. The atomic ratio of Pt to M in the precursor solution was 1.0. The preparation procedure was the same as that in the case of PtNi-H/C.
